# Supplementary material for: Pre-exposure prophylaxis (PrEP) for MSM in low HIV incidence places: should high risk individuals be targeted?
Source: PubMed Central journal article supplement (PMC6076226; doi:10.1038/s41598-018-30101-9), 2018-08-03
Supplement: 41598_2018_30101_MOESM1_ESM.pdf [file 41598_2018_30101_MOESM1_ESM.pdf]

## **Appendix A**

### **Pre-exposure prophylaxis (PrEP) for MSM in low HIV incidence places: should high risk individuals be targeted?**

Ngai Sze WONG<sup>1</sup>, Tsz Ho KWAN<sup>2</sup>, Owen TY TSANG<sup>3</sup>, Man Po LEE<sup>4</sup>, Wing Cheong YAM<sup>5</sup>, Wilson LAM<sup>4</sup>, Wai Shing LEUNG<sup>3</sup>, Jacky MC CHAN<sup>3</sup>, Kai Man HO<sup>3</sup>, Shui Shan LEE<sup>1\*</sup>

1 Stanley Ho Centre for Emerging Infectious Diseases, The Chinese University of Hong Kong, Hong Kong, China

2 Jockey Club School of Public Health and Primary Care, The Chinese University of Hong Kong, Hong Kong, China

3 Department of Medicine and Geriatrics, Princess Margaret Hospital, Hong Kong, China

4 Department of Medicine, Queen Elizabeth Hospital, Hong Kong, China

5 Department of Microbiology, The University of Hong Kong, Hong Kong, China

## Supplementary Material - additional model details

### High- and low-risk groups

Susceptible (HIV negative) MSM were categorized into high and low-risk susceptible MSM. High-risk MSM have a higher partner exchange rate and low-risk MSM have a lower rate. Defining  $\leq 8$  sexual partners per year as low-risk, 57% of MSM were low-risk as observed in our ongoing MSM sexual behavioral study. Similarly, infected MSM were categorized into high-and low-risk infected MSM in each sub-model. The proportion of low-risk infected MSM in each sub-model adopted the parameter setting in our previous study with adjustment by calibration (Table S1).[1] In the model, low-risk MSM are assumed to be in serial monogamy while high-risk MSM are assumed to be in random mixing (very high rate of partner exchange) partnership. The annual rate of sexual partner exchange of low-risk infected varied between sub-models, in accordance to the size of clusters (Table S1). We did not assume the flow of infected MSM between sub-models. However, high-risk susceptible MSM could develop sexual partnership with high-risk infected MSM from any sub-models. Similarly, low-risk susceptible MSM could mix with low-risk infected MSM from any sub-models (i.e. assortative mixing pattern).

**Table S1 proportion of low-risk infected MSM and characteristics of sexual partnership in MSM sub-models**

| Sub-models of different cluster types              | Proportion of low-risk infected MSM | Annual rate of sexual partner exchange for low-risk MSM in serial monogamy |
|----------------------------------------------------|-------------------------------------|----------------------------------------------------------------------------|
| isolates (1 node)                                  | 79% + b                             | 1 partner per 10 years                                                     |
| dyads or very small clusters (2-3 connected nodes) | 70%+ b                              | a                                                                          |
| small clusters (4-10 connected nodes)              | 66%+ b                              | a+1                                                                        |
| large clusters (>10 connected nodes)               |                                     |                                                                            |
| 11-25 connected nodes                              | 55%+ b                              | a+2                                                                        |
| 26-50 connected nodes                              | 50%+ b                              | a+2                                                                        |
| >50 connected nodes                                | 50%+ b                              | a+2                                                                        |

From model calibration,  $a = 6.7$ ,  $b = -2\%$ . The two parameters were used to adjust the value after the adoption from heterosexual model [1]

### Sub-model (j = 1-19) equations in model with PrEP

We defined  $S_h$  as the number of high risk susceptible individuals,  $S_l$  as the number of low risk susceptible individuals,  $A$  as undiagnosed individuals in acute infection,  $Un$  as undiagnosed individuals in chronic infection,  $UnAIDS$  as undiagnosed individual with AIDS,  $Dx$  as diagnosed individuals,  $DxL$  as loss to follow-up before treatment initiation,  $Tx$  as patients on treatment,  $TxL$  as patients loss to follow-up after treatment initiation,  $TxSVL$  as patients on treatment with viral load suppression ( $\leq 500$  copies/mL),  $TxNSVL$  as patients on treatment with non-suppressed viral load ( $> 500$  copies/mL). We add “prep” in name of compartment to denote compartments with PrEP users only.

#### In the model:

##### *Susceptible compartments without PrEP*

$$\frac{dS_h}{dt} = -\sum_{j=1}^{19} \lambda_{h,j}[t] * S_h[t] + (1 - lowrisk) * aMSM[t] - PrEP_h[t] * S_h[t] + dH * S_{hprep_H}[t] + dL * S_{hprep_L}[t]$$

$$\frac{dS_l}{dt} = -\sum_{j=1}^{19} \lambda_{l,j}[t] * S_l[t] + (lowrisk) * aMSM[t] - PrEP_l[t] * S_l[t] + dH * S_{lprep_H}[t] + dL * S_{lprep_L}[t]$$

Where **lowrisk** = proportion of MSM with  $\leq 8$  sex partners per year, **aMSM** = net change of MSM population, **PrEP<sub>h</sub>**=coverage of PrEP in high-risk MSM, **PrEP<sub>l</sub>**=coverage of PrEP in low-risk MSM;

##### *Susceptible compartments with PrEP*

###### *Susceptible high-risk MSM on high adherence PrEP*

$$\frac{dS_{hprep_H}}{dt} = -\sum_{j=1}^{19} \lambda_{h,j}[t] * (1 - efficacy_H) * S_{hprep_H}[t] + PrEP_h[t] * highadh_H * S_h[t] - (dH + toLPrEP) * S_{hprep_H}[t] + toHPrEP * S_{hprep_L}[t]$$

###### *Susceptible high-risk MSM on low adherence PrEP*

$$\frac{dS_{hprep_L}}{dt} = -\sum_{j=1}^{19} \lambda_{h,j}[t] * (1 - efficacy_L) * S_{hprep_L}[t] + PrEP_h[t] * (1 - highadh_H) * S_h[t] - (dL + toHPrEP) * S_{hprep_L}[t] + toLPrEP * S_{hprep_H}[t]$$

###### *Susceptible low-risk MSM on high adherence PrEP*

$$\frac{dS_{lprep_H}}{dt} = -\sum_{j=1}^{19} \lambda_{l,j}[t] * (1 - efficacy_H) * S_{lprep_H}[t] + PrEP_l[t] * highadh_L * S_l[t] - (dH + toLPrEP) * S_{lprep_H}[t] + toHPrEP * S_{lprep_L}[t]$$

###### *Susceptible low-risk MSM on low adherence PrEP*

$$\frac{dS_{lprep_L}}{dt} = -\sum_{j=1}^{19} \lambda_{l,j}[t] * (1 - efficacy_L) * S_{lprep_L}[t] + PrEP_l[t] * (1 - highadh_L) * S_l[t] - (dL + toHPrEP) * S_{lprep_L}[t] + toLPrEP * S_{lprep_H}[t]$$

Where **efficacy<sub>H</sub>**= efficacy of high adherence PrEP, **efficacy<sub>L</sub>**=efficacy of low adherence PrEP; **PrEP<sub>h</sub>**=coverage of PrEP in high-risk MSM, **PrEP<sub>l</sub>**=coverage of PrEP in low-risk MSM; **highadh<sub>H</sub>**=proportion of high-risk PrEP users in high adherence, **highadh<sub>L</sub>**=proportion of low-risk PrEP users in high adherence, **dH**=dropout rate of high adherence PrEP, **dL**=dropout rate of low adherence PrEP; **toLPrEP**=changing from high to low adherence PrEP; **toHPrEP**=changing from low to high adherence PrEP;

### In each sub-model:

#### *Undiagnosed compartments of non-PrEP users*

$$\begin{aligned}\frac{dA_j}{dt} &= \lambda_{l,j}[t] * S_l[t] + \lambda_{h,j}[t] * S_h[t] - (\alpha + mm) * A_j[t] + nonlocal_j[t] \\ \frac{dUn_j}{dt} &= \alpha * A_j[t] - (vc_{i=1}[t] + ((\tau_{i=1} + mm) * (1 - vc_{i=1,j}[t]))) * Un_{i=1,j}[t] + \\ &\sum_{i=2}^4 [\tau_{i-1} * (1 - vc_{i-1,j}[t]) * Un_{i-1,j}[t] - (vc_{i,j}[t] + ((\tau_i + mm) * (1 - vc_{i,j}[t]))) * Un_{i,j}[t]] \\ \frac{dUnAIDS_j}{dt} &= \tau_{i=4} * (1 - vc_{i=4,j}[t]) * Un_{i=4,j}[t] - (vc_{i=5} + ((mm + mu[t]) * (1 - vc_{i=5}))) * UnAIDS_j[t]\end{aligned}$$

#### *Undiagnosed compartments of PrEP users*

$$\begin{aligned}\frac{dApr_{ep_j}}{dt} &= \lambda_{h,j}[t] * (1 - efficacyH) * S_{hpr_{ep}_H}[t] + \lambda_{h,j}[t] * (1 - efficacyL) * S_{hpr_{ep}_L}[t] + \lambda_{l,j}[t] * (1 - efficacyH) * S_{lpr_{ep}_H}[t] \\ &+ \lambda_{l,j}[t] * (1 - efficacyL) * S_{lpr_{ep}_L}[t] - (\alpha + mm) * Apr_{ep_j}[t] \\ \frac{dUnpr_{ep_j}}{dt} &= \alpha * Apr_{ep_j}[t] - (vc_{i=1}[t] + ((\tau_{i=1} + mm) * (1 - vc_{i=1,j}[t]))) * Unpr_{ep_{i=1,j}}[t] + \\ &\sum_{i=2}^4 [\tau_{i-1} * (1 - vc_{i-1,j}[t]) * Un_{i-1,j}[t] - (vc_{i,j}[t] + ((\tau_i + mm) * (1 - vc_{i,j}[t]))) * Unpr_{ep_{i,j}}[t]] \\ \frac{dUnAIDSpr_{ep_j}}{dt} &= \tau_{i=4} * (1 - vc_{i=4,j}[t]) * Unpr_{ep_{i=4,j}}[t] - (vc_{i=5} + ((mm + mu[t]) * (1 - vc_{i=5}))) * UnAIDSpr_{ep_j}[t]\end{aligned}$$

#### *Diagnosed compartments*

$$\begin{aligned}\frac{dDx_j}{dt} &= vc_{i=1,j}[t] * Un_{i=1,j}[t] - (\tau_{i=1} + Tx_{i=1,j}[t] + dxlf_{i=1}[t] + mm) * Dx_{i=1,j}[t] + bc_{i=1}[t] * DxL_j[t] + \\ &\sum_{i=2}^4 [vc_{i,j}[t] * Un_{i,j}[t] + \tau_{i-1} * Dx_{i-1,j}[t] - (\tau_i + Tx_{i,j}[t] + trepgh - risk, l is low risk; "number is a persons\\\\M of any sub - \\ &)] + [vc_{i=5} * UnAIDS_j[t] + \tau_{i=4} * Dx_{i=4,j}[t] - (Tx_{i=5,j}[t] + dxlf_{i=5}[t] + mm + mu[t]) * Dx_{i=5,j}[t] + bc_{i=5}[t] * DxL_j[t]] \\ \frac{dDxL_j}{dt} &= \sum_{i=1}^5 dxlf_i[t] * Dx_{i,j}[t] - \sum_{i=1}^5 bc_i[t] * DxL_{i,j}[t] - mm * DxL_j[t] \\ \frac{dT_{xNSVL_j}}{dt} &= \sum_{i=1}^5 Tx_{i,j}[t] * Dx_{i,j}[t] - (\omega_j + \kappa1_j[t] + mm) * T_{xNSVL_j}[t] + \psi_j * T_{xSVL_j}[t] + \gamma_j * T_{xL_j}[t] \\ \frac{dT_{xSVL_j}}{dt} &= \omega_j * T_{xNSVL_j}[t] - (\kappa2_j[t] + \psi_j + mm) * T_{xSVL_j}[t] \\ \frac{dT_{xL_j}}{dt} &= \kappa1_j[t] * T_{xNSVL_j}[t] + \kappa2_j[t] * T_{xSVL_j}[t] - (\gamma_j + mm) * T_{xL_j}[t]\end{aligned}$$

Where  $j$ =infected MSM subgroups defined by phylogenetic results (group 1 to 19);  $i$  = 1 (CD4>500), 2 (CD4 351-500), 3 (CD4 201-350), 4 (CD4≤200), 5 (AIDS);  $h$  is high-risk,  $l$  is low risk;  $t$  is time, from 1981 to 2022, with time-step =1/52;

**Force of infection  $\lambda$**

$$\lambda_{l,j} = (\text{lowI}_j) *$$

$$R_{l,x=1} * A_j[t] + R_{l,x=2} * (\sum_{i=1}^4 Un_{i,j}[t] + \sum_{i=1}^4 Unprep_{i,j}[t] + DxL_j[t] + TxL_j[t]) + R_{l,x=3} * (UnAIDS_j[t] + UnAIDSprep_j[t]) + (R_{l,x=4} * \sum_{i=1}^5 Dx_{i,j}[t]) + R_{l,x=5} * TxNSVL_j[t] + R_{l,x=6} * TxSVL_j[t]$$

$$)/ N[t]$$

$$\lambda_{h,j} = ((1-\text{lowI}_j) *$$

$$R_{h,x=1} * A_j[t] + R_{h,x=2} * (\sum_{i=1}^4 Un_{i,j}[t] + \sum_{i=1}^4 Unprep_{i,j}[t] + DxL_j[t] + TxL_j[t]) + R_{h,x=3} * (UnAIDS_j[t] + UnAIDSprep_j[t]) + (R_{h,x=4} * \sum_{i=1}^5 Dx_{i,j}[t]) + R_{h,x=5} * TxNSVL_j[t] + R_{h,x=6} * TxSVL_j[t]$$

$$)/ N[t]$$

Where **lowI<sub>j</sub>** is the proportion of low risk infected MSM; **N** is the total number of MSM in the community regardless of HIV serostatus

$$N[t] = mN * \text{msmp} + a\text{MSM}[t]$$

Where **mN** is the number of adult male population (15-64 years old) in 1981; **msmp** is the proportion of sexual active MSM in adult male population, assuming constant over time; **aMSM** is the annual net change of number of MSM, which is proportional to the net change of adult male population size

and

reproduction number divided by duration for low risk level:  $R_{l,x} = \frac{\beta_x * c_l * \text{duration}_x}{(\beta_x + c_l + \frac{1}{\text{duration}_x})} \div \text{duration}_x$

reproduction number divided by duration for the high risk level:  $R_{h,x} = \frac{\beta_x * \text{duration}_x}{\text{duration}_x} = \beta_x$

Where **x** = 1 (acute infection), 2 (undiagnosed chronic infection or loss to follow-up), 3 (undiagnosed AIDS), 4 (diagnosed chronic infection and AIDS), 5 (treatment without viral load suppression), 6 (treatment with viral load suppression), **β**= transmission hazard, **c** = number of sex partners per year, **duration**= period of each stage (1/α for acute infection, 1/τ for chronic infection)

**Table S2 Model parameters**

| Description                                                | Symbol         | Estimated value                     | Further explanation / Source |
|------------------------------------------------------------|----------------|-------------------------------------|------------------------------|
| <b>Biological parameters</b>                               |                |                                     |                              |
| <u>Transmission hazard in heterosexuals (per year)</u>     | $\beta$        |                                     |                              |
| Undiagnosed acute infection                                | $\beta_1$      | 2.76                                | [2]                          |
| Undiagnosed chronic infection                              | $\beta_2$      | 0.106                               | [2]                          |
| Undiagnosed AIDS                                           | $\beta_3$      | 0.76                                | [2]                          |
| Diagnosed chronic infection and AIDS                       | $\beta_4$      | 0.036                               | [2]                          |
| Initiated treatment with NSVL                              | $\beta_5$      | 0.179                               | [3]                          |
| Initiated treatment with SVL                               | $\beta_6$      | 0.00178                             | [3]                          |
| Lost to follow-up                                          | $\beta_2$      | 0.106                               | [2]                          |
| Adjusting vector for estimating transmission hazard in MSM |                | 1.2                                 | Calibration                  |
| <u>Duration of disease stages</u>                          |                |                                     |                              |
| Acute infection                                            | $1/\alpha$     | 0.5 years                           | [2]                          |
| Chronic infection                                          | $1/\tau$       | Total 6.5 years                     | Clinical data                |
| CD4 >500/ $\mu$ L                                          | $1/\tau_{i=1}$ | 22 months                           | Clinical data                |
| CD4 351-500/ $\mu$ L                                       | $1/\tau_{i=2}$ | 21 months                           | Clinical data                |
| CD4 201-350/ $\mu$ L                                       | $1/\tau_{i=3}$ | 19 months                           | Clinical data                |
| CD4 $\leq$ 200/ $\mu$ L                                    | $1/\tau_{i=4}$ | 16 months                           | Clinical data                |
| Effectiveness of PrEP usage                                |                |                                     |                              |
| High adherence                                             | efficacyH      | 70%                                 | [4]                          |
| Low adherence                                              | efficacyL      | 23%                                 | [4]                          |
| Annual mortality rate for AIDS                             |                |                                     |                              |
| Before 2000                                                |                | 0.3                                 | Clinical data                |
| on or after 2000                                           |                | 0.1                                 | Clinical data                |
| Mortality rate for general population                      | mm             | 0.00517                             | Population census            |
| <b>Behavioral parameters</b>                               |                |                                     |                              |
| % of low risk group                                        | lowrisk        | 57%                                 | Data from our ongoing study  |
| Duration of stable sexual partnership                      | c              |                                     | Calibration                  |
| <b>PrEP usage</b>                                          |                |                                     |                              |
| Proportion of high risk group on PrEP                      | PrEPH          | [tested in sensitivity analysis]    | Assumption                   |
| High adherence                                             | highadhH       | [tested in sensitivity analysis]    | Assumption                   |
| Low adherence                                              | 1-highadhH     | 1- high adherence proportion        | Assumption                   |
| Proportion of low risk group on PrEP                       | PrEPL          | [tested in sensitivity analysis]    | Assumption                   |
| High adherence                                             | highadhL       | [tested in sensitivity analysis]    | Assumption                   |
| Low adherence                                              | 1-highadhL     | 1- high adherence proportion        | Assumption                   |
| Drop-out rate of PrEP usage                                | dH, dL         | 20% for both high and low adherence |                              |

---

|                                                            |                      |                                           |                                                                                                                                           |
|------------------------------------------------------------|----------------------|-------------------------------------------|-------------------------------------------------------------------------------------------------------------------------------------------|
| Annual rate of changing PrEP adherence                     |                      |                                           |                                                                                                                                           |
| From high to low adherence                                 | toLPrEP              | 20%                                       | [4]                                                                                                                                       |
| From low to high adherence                                 | toHPrEP              | 10%                                       | [4]                                                                                                                                       |
| <b>Cascade of HIV care</b>                                 |                      |                                           |                                                                                                                                           |
| Diagnosis rate                                             | $vc_i$               | Varied across time and sub-groups         | Clinical data                                                                                                                             |
| Loss to follow-up rate (before treatment)                  | $dxlf_i$             | Varied across time and sub-groups         | Clinical data                                                                                                                             |
| Back to care rate (before treatment)                       | $bc_i$               |                                           |                                                                                                                                           |
| Treatment initiation rate                                  | $Tx_i$               | Varied across time and sub-groups         | Clinical data                                                                                                                             |
| Treatment loss to follow-up rate                           | $\kappa_1, \kappa_2$ | Varied across time and sub-groups         | Clinical data                                                                                                                             |
| Back to treatment rate                                     | $\gamma$             | Varied across time and sub-groups         | Clinical data                                                                                                                             |
| Viral suppression rate                                     | $\omega$             | Varied across sub-groups                  | Clinical data                                                                                                                             |
| Viral rebound rate                                         | $\psi$               | Varied across sub-groups                  | Clinical data                                                                                                                             |
| <b>Others</b>                                              |                      |                                           |                                                                                                                                           |
| Non-locally acquired infections                            | nonlocal             | Varied across time and sub-groups         | Annual surveillance reports for the total number of non-local infections,[5] and randomly assigned to subgroups, validated by simulations |
| Male (aged 15-64) population size                          | mN                   | 1904357 in 1981                           | [6]                                                                                                                                       |
| Proportion of sexually active MSM in adult male population | msmp                 | 0.02                                      | [7]                                                                                                                                       |
| Annual net change of number of MSM                         | aMSM                 | Net change of mN * msmp, change over time | [6], [7]                                                                                                                                  |

---

Supplementary figures

**Supplementary Fig. S1. Model simulations (100 times) of annual number of new diagnoses by randomly assigning non-locally acquired infections to 19 sub-models**

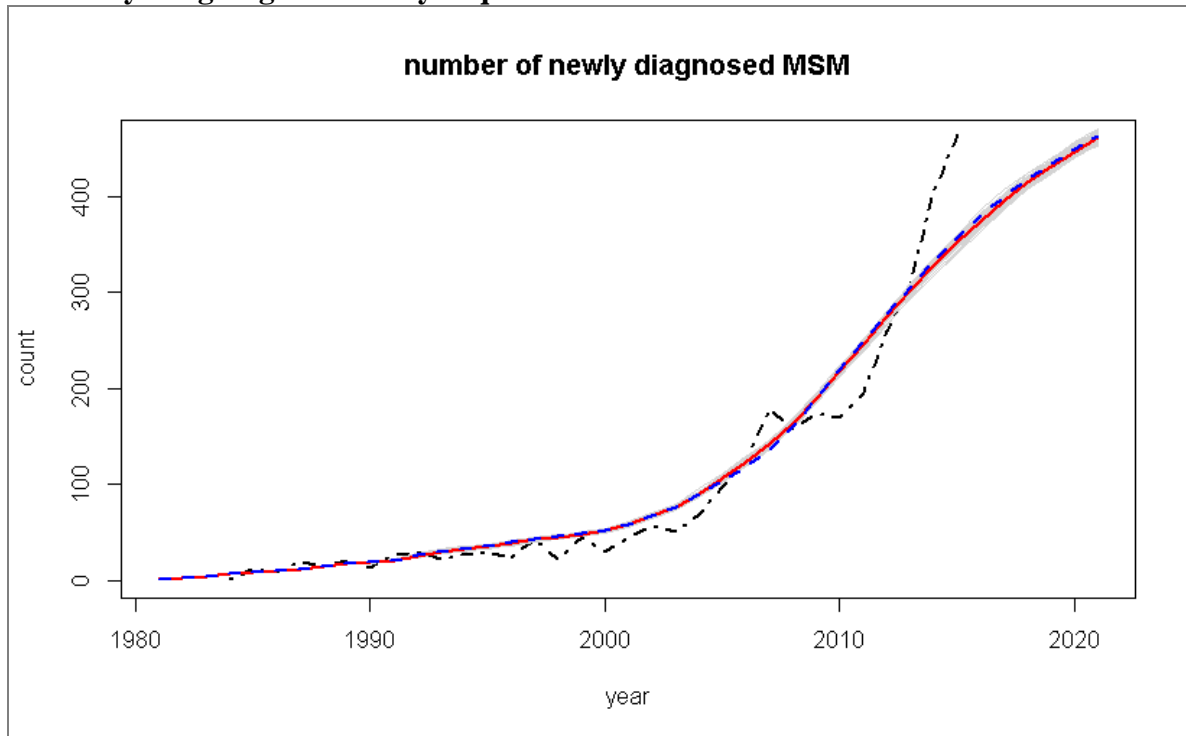



**Supplementary Fig. S2. Estimates of proportion of new infections averted in 2021 above basecase scenario without PrEP in sensitivity analyses of 0-95% low adherence and high adherence PrEP coverage target high and low-risk groups**

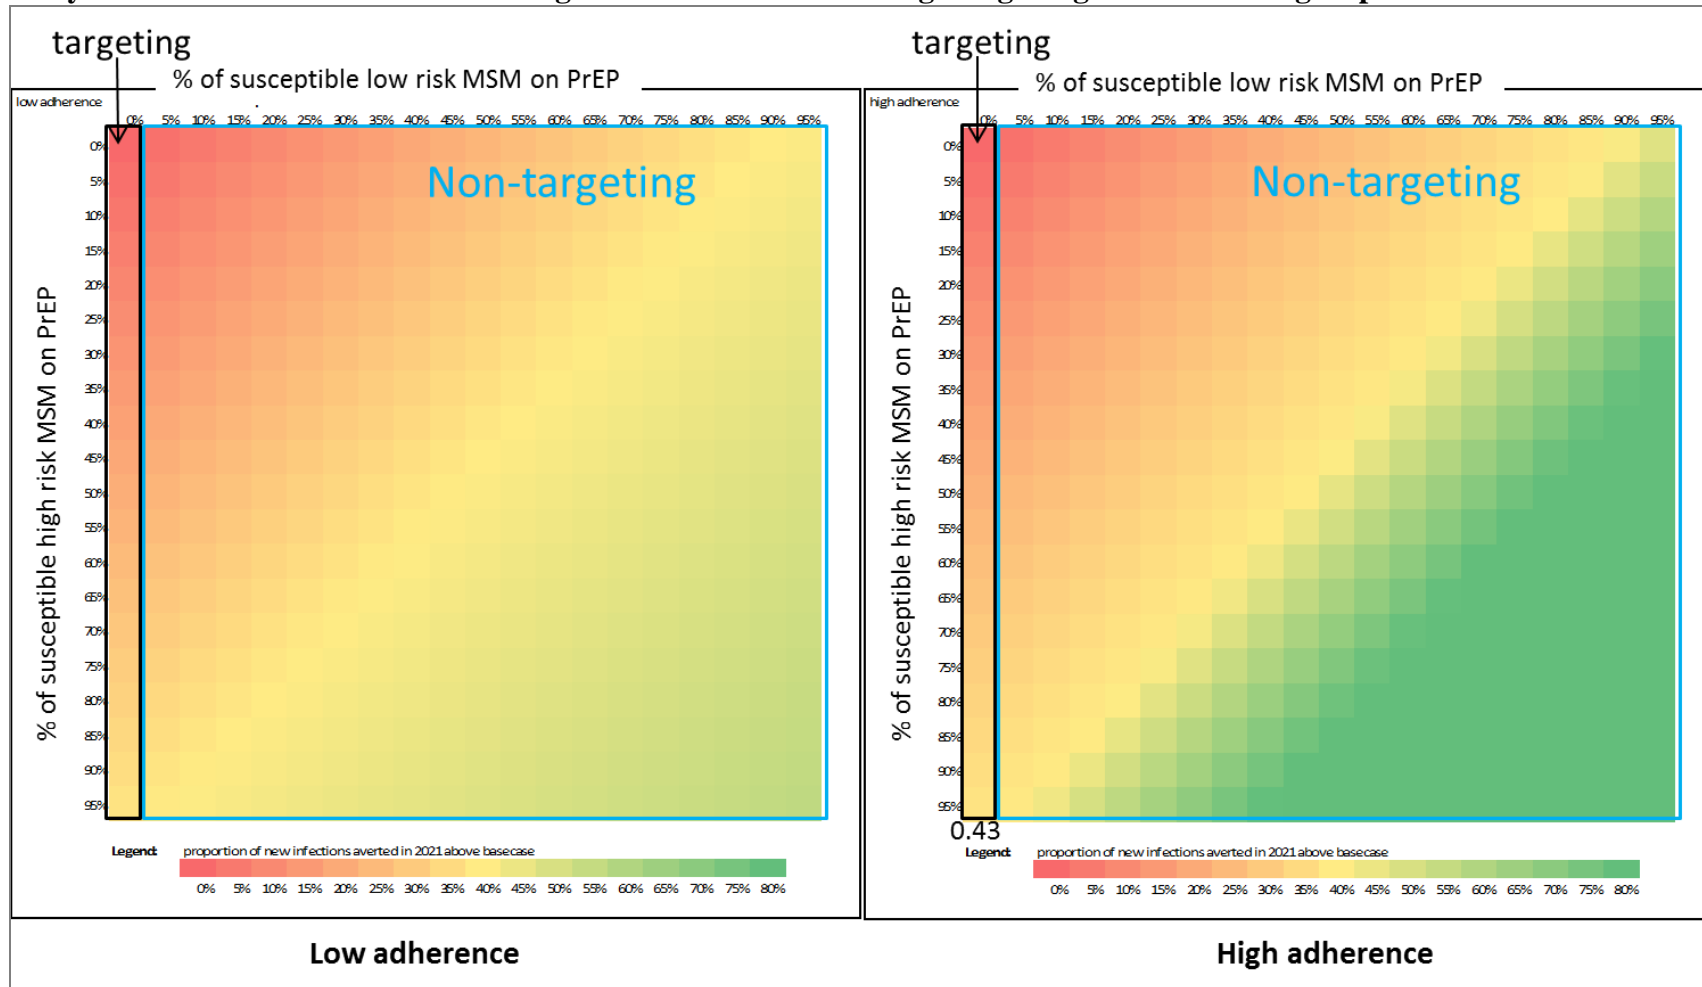

**Supplementary Fig. S3. Impact of overall effectiveness of PrEP along high adherence PrEP coverage (1%, 10% and 90%) in MSM**

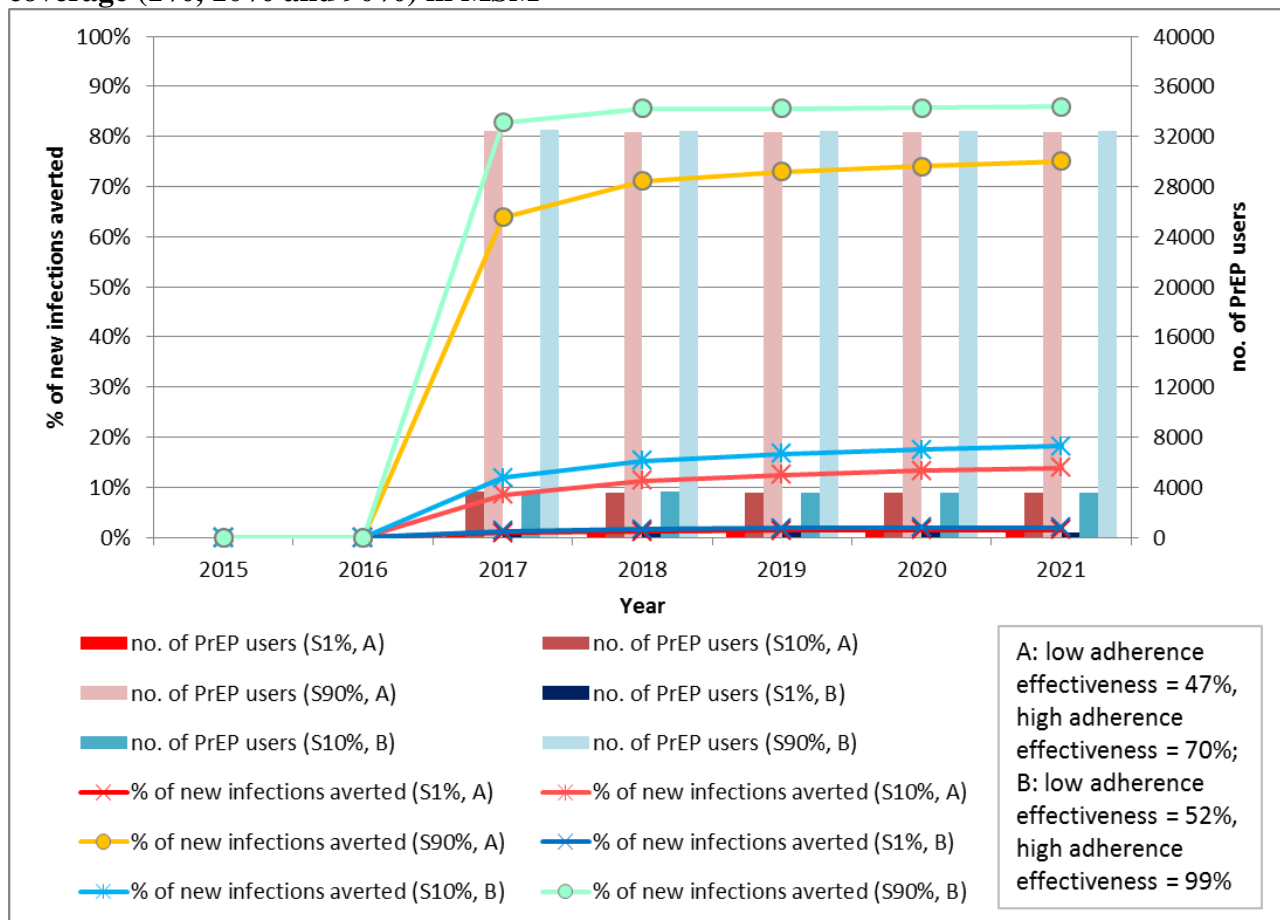

The impact of PrEP effectiveness were analysed in scenarios of increasing the effectiveness of PrEP (A) from 23% to 47% in low adherence, and effectiveness of high adherence remains 70%; (B) increasing from 23% to 52% in low adherence, and from 70% to 99% in high adherence.

**Supplementary Fig. S4. In high HIV incidence place, estimates of proportion of new infections averted in 2021 above scenario without PrEP in sensitivity analyses of 0-90% high adherence PrEP coverage target high and low-risk groups**

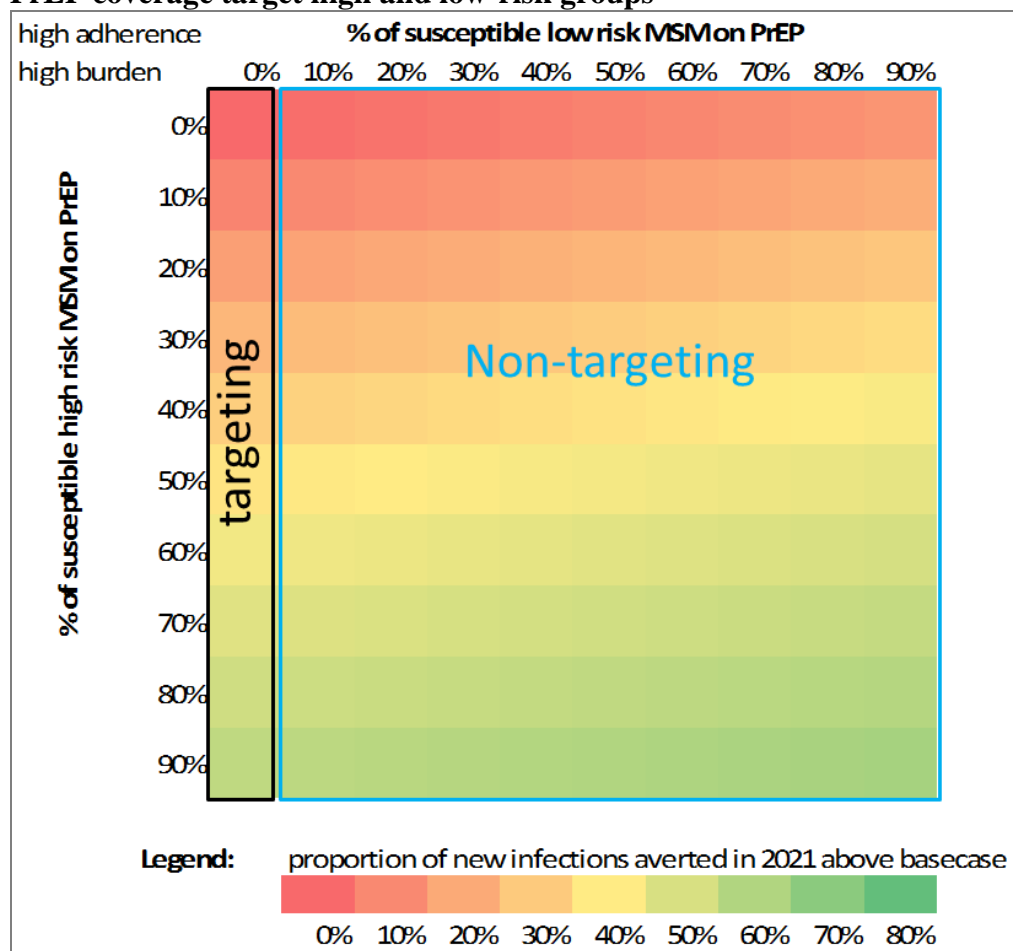

**Supplementary Fig. S5. Model simulation results by random mixing (red lines) and assortative mixing in 19-model (blue lines), in comparison with observed data (black dots)**

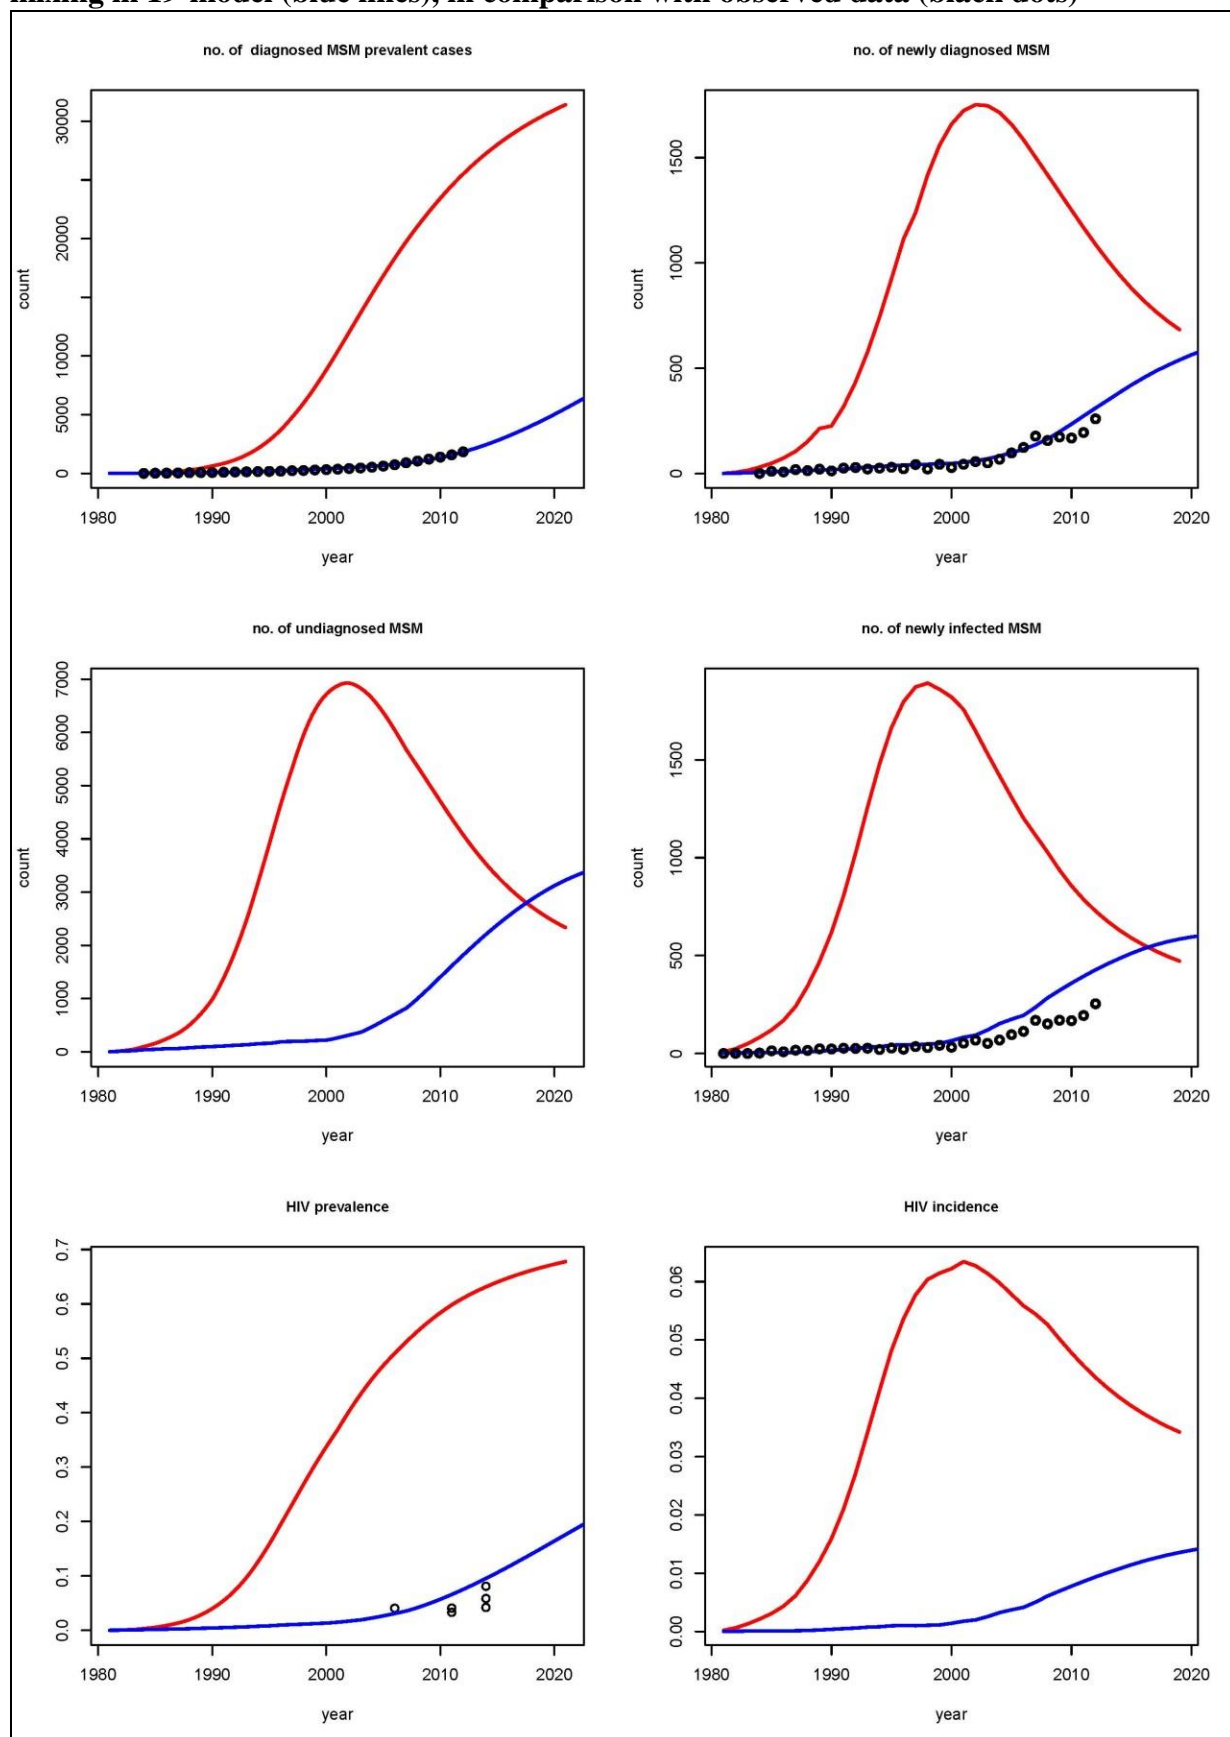

**Table S3 parameters for cost-effectiveness analysis**

| Parameter                                                                             | Value   | Source                                                                                                                                                                                                                                                                                                                                                                                              |
|---------------------------------------------------------------------------------------|---------|-----------------------------------------------------------------------------------------------------------------------------------------------------------------------------------------------------------------------------------------------------------------------------------------------------------------------------------------------------------------------------------------------------|
| <b>Annual cost in year 2016 (USD)</b>                                                 |         |                                                                                                                                                                                                                                                                                                                                                                                                     |
| Specialist visit (4 visits per year for HIV patients and PrEP users)                  | \$536   | Specialist visit cost as listed in <a href="http://gia.info.gov.hk/general/201106/29/P201106290186_0186_80935.pdf">http://gia.info.gov.hk/general/201106/29/P201106290186_0186_80935.pdf</a> ;<br>Further adjustment was made by inflation rate (composite consumer price index) estimated by Census and Statistics Department, Hong Kong Special Administrative Region.                            |
| PrEP annual cost (high adherence in 87.5% usage, daily oral HKD188 (~\$24) per dose)  | \$7703  | Market price of PrEP drug in 2016;<br>With reference to the previous study,[4] high adherence PrEP users were defined as $\geq 75\%$ usage. We take the mid-point of 75% and 100% for the estimation of PrEP annual cost;<br>Further adjustment was made by inflation rate (composite consumer price index) estimated by Census and Statistics Department, Hong Kong Special Administrative Region. |
| PrEP annual cost (low adherence in 38% usage, daily oral HKD188 (~\$24) per dose)     | \$3345  | Market price of PrEP drug in 2016;<br>We take the mid-point of 1% and 75% for the estimation of low adherence usage of PrEP (38%).[4];<br>Further adjustment was made by inflation rate (composite consumer price index) estimated by Census and Statistics Department, Hong Kong Special Administrative Region.                                                                                    |
| Testing cost for PrEP (HIV per visit, and creatinine, syphilis, CT, NG once per year) | \$104   |                                                                                                                                                                                                                                                                                                                                                                                                     |
| ART annual cost for HIV-infected                                                      | \$16761 |                                                                                                                                                                                                                                                                                                                                                                                                     |
| cost for CD4 and viral load measurement (4 times per year)                            | \$410   |                                                                                                                                                                                                                                                                                                                                                                                                     |
| <b>Utility</b>                                                                        |         |                                                                                                                                                                                                                                                                                                                                                                                                     |
| Noninfected                                                                           | 1       | [8]                                                                                                                                                                                                                                                                                                                                                                                                 |
| Pre-treatment with                                                                    |         |                                                                                                                                                                                                                                                                                                                                                                                                     |
| CD4 $\geq 350$                                                                        | 0.935   | [8]                                                                                                                                                                                                                                                                                                                                                                                                 |
| CD4 200-349                                                                           | 0.818   | [8]                                                                                                                                                                                                                                                                                                                                                                                                 |
| CD4 <200 or AIDS                                                                      | 0.702   | [8]                                                                                                                                                                                                                                                                                                                                                                                                 |
| On treatment with NSVL                                                                | 0.818   | As viral load level is significantly associated with CD4 level, patients with NSVL are commonly with lower CD4 level and probably lower utility.                                                                                                                                                                                                                                                    |
| On treatment with SVL                                                                 | 0.935   | We assume that CD4 level of patients with SVL is recovering to a satisfactory level with high utility.                                                                                                                                                                                                                                                                                              |
| Loss to follow-up                                                                     | 0.818   | Patients lost to follow-up are mostly with NSVL.                                                                                                                                                                                                                                                                                                                                                    |
| Death                                                                                 | 0       |                                                                                                                                                                                                                                                                                                                                                                                                     |
| <b>Annual discounted rate</b>                                                         | 3.5%    | [8]                                                                                                                                                                                                                                                                                                                                                                                                 |

NSVL – non-suppressed viral load (>500 copies/mL); SVL – suppressed viral load ( $\leq 500$  copies/mL)

## Reference

1. Wong, N.S. *The incorporation of viral load measures at sub-population level for modelling the HIV epidemic in Hong Kong.* (2015).
2. Hollingsworth, T.D., Anderson, R.M. & Fraser, C. HIV-1 transmission, by stage of infection. *J Infect Dis.* **198**, 687-93 (2008).
3. Jean, K. et al. Effect of early antiretroviral therapy on sexual behaviors and HIV-1 transmission risk among adults with diverse heterosexual partnership statuses in Côte d'Ivoire. *The Journal of Infectious Diseases.* **209**,431-40 (2014).
4. Mitchell, K.M. et al. Potential impact of pre-exposure prophylaxis for female sex workers and men who have sex with men in Bangalore, India: a mathematical modelling study. *J Int AIDS Soc.* **19**, 20942 (2016).
5. Virtual AIDS Office of Hong Kong. *Virtual AIDS Office – HIV surveillance office.* [http://www.info.gov.hk/aids/english/surveillance/sur\\_report/hiv15.pdf](http://www.info.gov.hk/aids/english/surveillance/sur_report/hiv15.pdf) (2015)
6. Census and Statistics Department HKSAR. *Demographic trends in Hong Kong 1981–2011.* <http://www.censtatd.gov.hk/hkstat/sub/sp150.jsp?productCode=B1120017> (2012)
7. Lau, J.T., Siah, P.C. & Tsui, H.Y. A study of the STD/AIDS related attitudes and behaviors of men who have sex with men in Hong Kong. *Arch Sex Behav.* **31**, 367-73 (2002).
8. Schneider, K., Gray, R.T. & Wilson, D.P. A Cost-effectiveness Analysis of HIV Preexposure Prophylaxis for Men Who Have Sex With Men in Australia. *Clin Infect Dis.* **58**, 1027-34 (2014).
